# Supplementary material for: An Update on Wastewater Multi-Resistant Bacteria: Identification of Clinical Pathogens Such as Escherichia coli O25b:H4-B2-ST131-Producing CTX-M-15 ESBL and KPC-3 Carbapenemase-Producing Klebsiella oxytoca
Source: MDPI journal article supplement (doi:10.3390/microorganisms9030576), 2021-03-11
Supplement: s1 [file s1]

| BEI-DSR  |                |           |               |                     | BEI-EFL  |                |           |               |                     |
|----------|----------------|-----------|---------------|---------------------|----------|----------------|-----------|---------------|---------------------|
|          | total bacteria | coliforms | <i>E.coli</i> | <i>Enterococcus</i> |          | total bacteria | coliforms | <i>E.coli</i> | <i>Enterococcus</i> |
| 21/11/16 | 2.20E+08       | 1.16E+06  | 2.40E+05      | 1.70E+04            | 21/11/16 | 6.40E+05       | 5.40E+02  | 8.00E+01      | 9.00E+01            |
| 12/12/16 | 8.80E+07       | 3.00E+06  | 1.28E+06      | 9.00E+04            | 12/12/16 | 2.68E+05       | 3.00E+03  | 3.00E+02      | 3.00E+02            |
| 03/01/17 | 6.40E+07       | 1.21E+06  | 2.00E+05      | 1.04E+06            | 03/01/17 | 2.00E+04       | 1.50E+03  | 1.60E+02      | 1.32E+02            |
| 06/02/17 | 2.34E+07       | 4.00E+04  | 1.00E+04      | 6.50E+04            | 06/02/17 | 1.40E+05       | 2.00E+03  | 6.50E+02      | 2.00E+03            |
| 06/03/17 | 1.90E+07       | 3.00E+04  | 1.70E+03      | 9.10E+04            | 06/03/17 | 6.00E+04       | 4.60E+02  | 8.00E+01      | 5.80E+01            |
| 11/04/17 | 6.50E+07       | 1.00E+04  | 2.00E+02      | 4.80E+03            | 11/04/17 | 4.50E+04       | 3.00E+03  | 1.70E+02      | 2.40E+02            |
| 08/05/17 | 1.46E+08       | 4.80E+04  | 2.00E+06      | 2.00E+06            | 08/05/17 | 5.50E+04       | 3.00E+02  | 2.40E+02      | 2.16E+03            |
| 05/06/17 | 3.20E+07       | 4.80E+04  | 2.00E+06      | 2.00E+06            | 05/06/17 | 4.50E+04       | 2.00E+02  | 2.00E+02      | 1.24E+02            |
| 03/07/17 | 3.80E+08       | 1.35E+06  | 4.00E+05      | 4.30E+05            | 03/07/17 | 8.90E+04       | 6.20E+02  | 6.00E+02      | 5.00E+02            |
| 11/09/17 | 1.08E+08       | 1.02E+07  | 1.20E+06      | 1.02E+06            | 11/09/17 | 1.00E+05       | 1.50E+03  |               | 1.30E+02            |
| 10/10/17 | 7.00E+07       | 1.08E+05  | 4.50E+04      | 1.31E+05            | 10/10/17 | 5.20E+04       | 2.60E+02  | 1.00E+01      | 1.40E+02            |
| 12/12/17 | 2.80E+06       | 2.70E+04  | 2.00E+03      |                     | 12/12/17 | 4.80E+04       | 3.80E+03  | 1.00E+03      | 3.00E+01            |
| 09/01/18 | 9.10E+05       | 3.00E+03  |               |                     | 09/01/18 | 4.60E+03       | 3.20E+02  |               |                     |
| 05/02/18 | 7.40E+06       | 2.20E+05  | 1.50E+04      | 1.00E+04            | 05/02/18 | 2.40E+03       | 2.00E+01  | 1.00E+01      | 1.00E+01            |
| 05/03/18 | 3.20E+05       | 6.00E+04  | 1.00E+04      |                     | 05/03/18 | 6.80E+02       | 4.50E+02  |               |                     |
| 02/04/18 | 2.12E+06       | 8.00E+03  | 2.00E+03      |                     | 02/04/18 | 6.00E+02       | 4.00E+01  | 2.00E+01      |                     |
| 07/05/18 | 1.80E+06       | 1.00E+04  |               |                     | 07/05/18 | 1.40E+03       | 1.40E+02  | 1.00E+01      |                     |
| 04/06/18 | 7.50E+06       | 1.06E+06  | 1.50E+05      | 3.10E+05            | 04/06/18 | 3.70E+03       | 9.40E+02  | 5.00E+01      | 1.10E+02            |
| 02/07/18 | 1.02E+07       | 1.51E+06  | 1.81E+05      | 1.77E+05            | 02/07/18 | 7.00E+03       | 4.70E+03  | 4.40E+02      | 2.10E+02            |
| 11/09/18 | 5.80E+07       | 6.20E+05  | 1.60E+05      | 1.13E+05            | 11/09/18 | 1.40E+03       | 9.00E+01  | 6.00E+01      | 4.40E+03            |
| 02/10/18 | 4.60E+07       | 6.10E+05  | 1.16E+05      | 4.50E+03            | 02/10/18 | 4.00E+03       | 1.00E+02  | 7.00E+01      | 7.70E+02            |
| 06/11/18 | 2.10E+07       | 2.30E+05  | 1.40E+05      | 1.10E+05            | 06/11/18 | 1.20E+05       | 2.30E+04  | 3.00E+02      | 2.60E+02            |
| 03/12/18 | 1.50E+07       | 4.60E+06  | 3.50E+06      | 3.00E+05            | 05/12/18 | 4.50E+04       | 1.28E+03  | 2.30E+02      | 1.10E+02            |
| 07/01/19 | 2.50E+07       | 5.50E+06  | 3.20E+06      | 1.41E+06            | 07/01/19 | 1.31E+05       | 2.80E+03  | 1.50E+03      | 4.30E+02            |
|          | 5.89E+07       | 1.32E+06  | 6.75E+05      | 4.91E+05            |          | 7.85E+04       | 2.13E+03  | 2.94E+02      | 6.10E+02            |

| FNw-AFB  |                |           |               |                     | FNw-EFT  |                |           |               |                     |
|----------|----------------|-----------|---------------|---------------------|----------|----------------|-----------|---------------|---------------------|
|          | total bacteria | coliforms | <i>E.coli</i> | <i>Enterococcus</i> |          | total bacteria | coliforms | <i>E.coli</i> | <i>Enterococcus</i> |
| 23/11/16 | 1.60E+07       | 3.60E+04  | 1.10E+04      | 2.00E+02            | 23/11/16 | 2.00E+03       | 8.00E+01  |               |                     |
| 14/12/16 | 1.83E+07       | 3.00E+05  | 1.06E+05      | 5.10E+03            | 14/12/16 | 1.48E+04       | 2.40E+01  |               |                     |
| 04/01/17 | 1.46E+07       | 2.80E+05  | 7.80E+04      | 3.20E+03            | 04/01/17 | 1.50E+04       |           |               |                     |
| 08/02/17 | 5.50E+07       | 3.00E+05  | 9.40E+04      | 3.00E+02            | 08/02/17 | 3.80E+04       | 7.90E+01  |               |                     |
| 08/03/17 | 4.80E+06       | 3.00E+05  | 5.20E+04      | 1.72E+04            | 08/03/17 | 9.00E+03       | 1.56E+02  |               |                     |
| 13/04/17 | 1.80E+07       | 3.00E+05  | 2.40E+05      | 1.00E+04            | 13/04/17 | 2.80E+04       | 1.17E+02  |               |                     |
| 10/05/17 | 2.16E+07       | 3.00E+04  | 3.00E+04      |                     | 10/05/17 | 1.80E+04       | 4.00E+03  |               |                     |
| 07/06/17 | 4.10E+07       | 2.00E+06  |               | 2.80E+05            | 07/06/17 | 4.40E+04       |           |               |                     |
| 05/07/17 | 1.20E+06       | 3.00E+04  |               |                     | 05/07/17 | 2.20E+03       | 1.00E+02  |               |                     |
| 13/09/17 | 1.40E+07       | 1.35E+05  | 4.00E+04      | 4.30E+04            | 13/09/17 | 5.30E+03       | 2.20E+02  |               |                     |
| 12/10/17 | 3.00E+06       | 2.80E+05  | 1.47E+05      | 3.90E+04            | 13/10/17 | 1.80E+02       | 2.30E+02  | 1.00E+01      |                     |
| 15/12/17 | 9.00E+05       | 4.50E+04  | 4.00E+03      |                     | 15/12/17 | 6.20E+03       | 1.00E+03  | 1.00E+01      | 2.20E+02            |
| 11/01/18 | 3.90E+05       | 1.10E+04  |               |                     | 11/01/18 | 2.20E+04       | 3.00E+01  |               |                     |
| 07/02/18 | 3.00E+06       | 7.00E+04  | 4.20E+04      | 1.00E+04            | 07/02/18 | 9.00E+02       | 3.00E+01  |               |                     |
| 07/03/18 | 3.00E+06       | 4.50E+04  | 1.50E+04      | 7.00E+03            | 07/03/18 | 9.00E+02       | 3.00E+01  |               |                     |
| 04/04/18 | 3.00E+06       | 7.00E+04  | 4.20E+04      | 1.00E+04            | 04/04/18 | 2.70E+03       | 1.10E+02  | 2.00E+01      |                     |
| 09/05/18 | 1.43E+06       | 3.60E+04  | 1.30E+04      | 8.00E+03            | 09/05/18 | 2.70E+03       | 1.00E+02  |               |                     |
| 06/06/18 | 5.20E+07       | 5.50E+06  | 9.60E+05      | 1.00E+05            | 06/06/18 | 7.60E+03       | 1.60E+02  |               |                     |
| 04/07/18 | 3.40E+06       | 9.40E+05  | 1.70E+05      | 4.00E+04            | 04/07/18 | 5.70E+03       |           |               | 4.20E+02            |
| 13/09/18 | 7.20E+07       | 2.90E+05  | 1.40E+05      | 6.60E+04            | 11/09/18 | 7.00E+03       | 4.20E+02  | 9.00E+01      | 1.80E+03            |
| 04/10/18 | 6.00E+07       | 5.00E+05  | 3.00E+05      | 7.00E+04            | 04/10/18 | 1.50E+04       | 4.00E+02  | 1.10E+02      | 2.80E+03            |
| 08/11/18 | 2.40E+07       | 4.60E+05  | 8.00E+04      | 5.00E+04            | 08/11/18 | 1.70E+03       | 2.10E+03  | 3.00E+02      | 6.00E+01            |
| 05/12/18 | 7.50E+06       | 1.00E+05  | 7.00E+04      | 4.30E+04            | 05/12/18 | 3.00E+04       |           |               | 1.00E+01            |
| 09/01/19 | 9.20E+06       | 3.00E+05  | 1.00E+05      | 8.00E+04            | 09/01/19 | 5.00E+04       | 1.30E+03  | 4.30E+02      | 2.40E+02            |
|          | 1.86E+07       | 5.15E+05  | 1.30E+05      | 4.41E+04            |          | 1.37E+04       | 5.34E+02  | 1.39E+02      | 7.93E+02            |
